# Supplementary material
Source: publisher figshare collection journal article supplement (https://karger.figshare.com/ndownloader/files/13525454)
Supplement: Supplementary file 1 [file 13525454]

**Supplementary Tables**

**Increased weight gain during the long interdialytic period is associated with minor effects on blood pressure control in clinically stable in-centre hemodialysis patients**

Mohamed Shantier1,2, William P. Martin1, Rajneet Singh1, Paul McDermott1, Rory Gallen3, Sami Suleiman1, Donal N. Reddan1, Louise Giblin1, David Lappin1, Yvonne M. O’Meara3, Matthew D. Griffin1,2

1 Nephrology Services, Saolta University Healthcare Group, Galway, Ireland.

2 School of Medicine, College of Medicine, Nursing and Health Sciences, National University of Ireland Galway, Ireland.

3 Department of Nephrology, Mater Misericordiae University Hospital, Dublin, Ireland

**Address for Correspondence:** Prof. Matthew D. Griffin, National University of Ireland Galway, Biomedical Sciences, Corrib Village, Dangan, Galway, H91 TK33 Ireland

Phone: +353-91-495436. Email: [matthew.griffin@nuigalway.ie](mailto:matthew.griffin@nuigalway.ie)

**Table S1.** Pre-dialysis blood pressure parameters and inter-dialytic weight gain measured after the long inter-dialytic period and each of the two short inter-dialytic periods for Cohort 1 (GUH/MGH).

|  | **No. of Measurements** | **Long IDP** | **Short IDP1** | **Short IDP2** | **p*** |
| --- | --- | --- | --- | --- | --- |
| **Pre-dialysis SBP (mean ± SD, mm Hg)** | 308 | 144 ± 22 | 143 ± 21 | 142 ± 22 | 0.194 |
| **Pre-dialysis DBP (mean ± SD, mm Hg)** | 308 | 81 ± 13 | 80 ± 13 | 80 ± 13 | 0.188 |
| **Pre-dialysis MAP (mean ± SD, mm Hg)** | 308 | 102 ± 14 | 101 ± 14 | 101 ± 14 | 0.095 |
| **Pre-dialysis PP**  **(mean ± SD, mm Hg)** | 308 | 63 ± 19 | 62 ± 19 | 62 ± 19 | 0.799 |
| **Absolute IDWG (mean ± SD, kg)** | 278 | 2.6 ± 1.3 | 2.0 ± 1.1 | 2.0 ± 1.1 | <0.001 |
| **Percentage IDWG (mean ± SD, %)** | 255 | 3.4 ± 1.6 | 2.6 ± 1.4 | 2.65 ± 1.3 | <0.001 |

† Abbreviations: IDP = Inter-dialytic Period; SBP = systolic blood pressure; DBP = diastolic blood pressure; MAP = mean arterial pressure; PP = pulse pressure; IDWG = inter-dialytic weight gain

*Statistical test: One-way repeated measures ANOVA conducted through General Linear Model.

**Table S2.** Pre-dialysis blood pressure parameters and inter-dialytic weight gain measured after the long inter-dialytic period and each of the two short inter-dialytic periods for Cohort 2 (MUH).

|  | **No. of Measurements** | **Long IDP** | **Short IDP1** | **Short IDP2** | **p*** |
| --- | --- | --- | --- | --- | --- |
| **Pre-dialysis SBP (mean ± SD, mm Hg)** | 214 | 141 ± 29 | 138 ± 27 | 140 ± 27 | 0.227 |
| **Pre-dialysis DBP (mean ± SD, mm Hg)** | 214 | 65 ± 18 | 64 ± 19 | 65 ± 19 | 0.693 |
| **Pre-dialysis MAP (mean ± SD, mm Hg)** | 213 | 91 ± 17 | 89 ± 18 | 90 ± 19 | 0.294 |
| **Pre-dialysis PP**  **(mean ± SD, mm Hg)** | 213 | 76 ± 25 | 74 ± 25 | 75 ± 26 | 0.438 |
| **Absolute IDWG (mean ± SD, kg)** | 194 | 2.3 ± 1.1 | 1.5 ± 0.8 | 1.6 ± 0.75 | <0.001 |
| **Percentage IDWG (mean ± SD, %)** | 192 | 3.2 ± 1.6 | 2.1 ± 1.2 | 2.2 ± 1.1 | <0.001 |

† Abbreviations: IDP = Inter-dialytic Period; SBP = systolic blood pressure; DBP = diastolic blood pressure; MAP = mean arterial pressure; PP = pulse pressure; IDWG = inter-dialytic weight gain

*Statistical test: One-way repeated measures ANOVA conducted through General Linear Model.
